# Supplementary material for: Predictions of time to HIV viral rebound following ART suspension that incorporate personal biomarkers
Source: PLOS journal article supplement (doi:10.1371/journal.pcbi.1007229), 2019-07-24

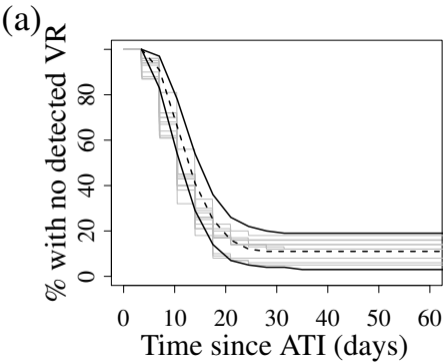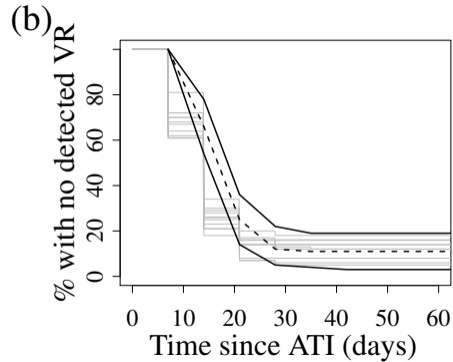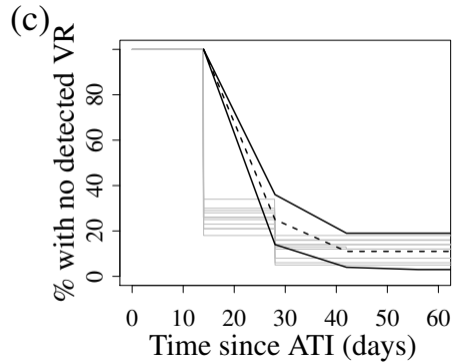

Supplement: S10 (10.1371/journal.pcbi.1007229.s010) [file journal.pcbi.1007229.s010]
